# Supplementary material for: Synthesis and catalytic application of palladium nanoparticles supported on kaolinite-based nanohybrid materials
Source: Royal Society of Chemistry journal article supplement (doi:10.1039/c6dt00982d), 2016-01-01
Supplement: c6dt00982d1.pdf [file c6dt00982d1.pdf]

## Supporting Information

### **Synthesis and catalytic application of palladium nanoparticles supported on kaolinite-based nanohybrid materials†**

Gaëlle Ngnie,<sup>\*a</sup> Gustave. K. Dedzo,<sup>\*a,b</sup> and Christian Detellier<sup>a</sup>

<sup>a</sup>Center for Catalysis Research and Innovation and Department of Chemistry and Biomolecular Sciences, University of Ottawa, Ottawa, Ontario K1N 6N5, Canada.

<sup>b</sup>Laboratory of Analytical Chemistry, Faculty of Science, University of Yaoundé I, B.P. 812, Yaoundé, Cameroon.

E-mails: gngnietu@uottawa.ca, gkennede@uottawa.ca

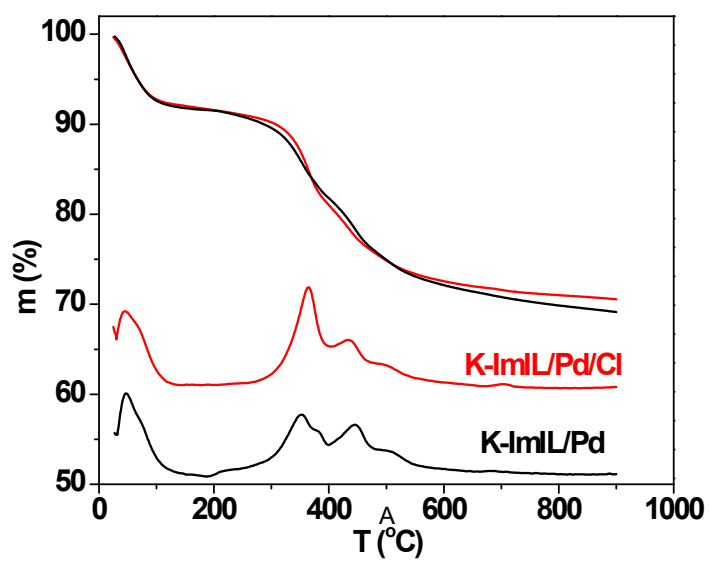

Fig. S1 TGA/DTGA of (Black lines) K-ImIL/Pd and (Red lines) K-ImIL/Pd/Cl modified kaolinite.

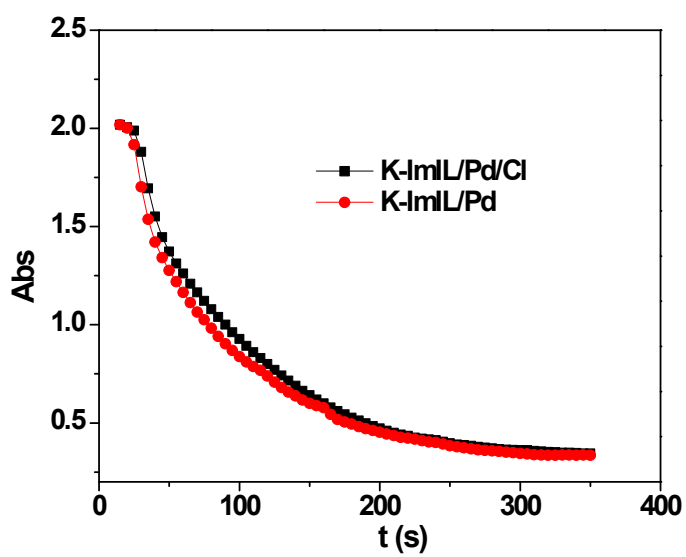

Fig. S2 Variation of 4-NP maximum absorbance at 400 nm for K-ImIL/Pd and K-ImIL/Pd/Cl during the catalytic reduction of 4-NP in the presence of  $\text{NaBH}_4$ .
